# Supplementary material
Source: PubMed Central journal article supplement (PMC5961041)
Supplement: supp_RA118.002205_135706_2_supp_90669_p5bdx1.pdf [file supp_RA118.002205_135706_2_supp_90669_p5bdx1.pdf]

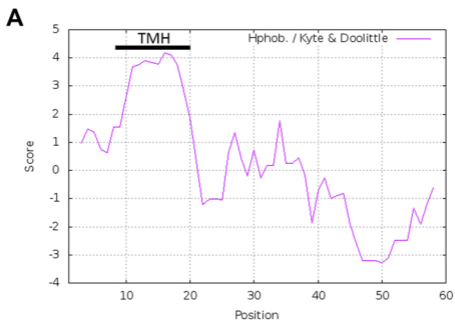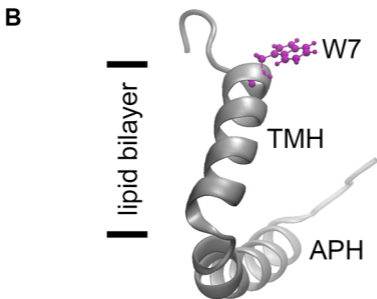

Figure S1: The TMH of TatA begins at Trp-7 (Ref 6) and therefore is very short. (A) Kyte & Doolittle hydropathy plot of TatA<sub>(1-60)</sub>, (B) NMR structure (PDB 2MN7)
